# Supplementary material for: Characterization of fresh and aged organic aerosol emissions from meat charbroiling
Source: Copernicus journal article supplement (doi:10.5194/acp-2016-979), 2016-11-21
Supplement: Supplementary file 1 [file acp-2016-979-supplement.pdf]

**Supplementary information for manuscript**

**Characterization of fresh and aged organic aerosol emissions from meat  
charbroiling**

Christos Kaltsonoudis<sup>1,2</sup>, Evangelia Kostenidou<sup>1</sup>, Evangelos Louvaris<sup>1,2</sup>, Magda  
Psichoudaki<sup>1,2</sup>, Epameinondas Tsiligiannis<sup>1,2</sup>, Kalliopi Florou<sup>1,2</sup>, Aikaterini Liangou<sup>1,2</sup>,  
and Spyros N. Pandis<sup>1,2,3</sup>

<sup>1</sup>Institute of Chemical Engineering Sciences, ICE-HT, Patras, Greece

<sup>2</sup>Department of Chemical Engineering, University of Patras, Patras, Greece

<sup>3</sup>Department of Chemical Engineering, Carnegie Mellon University, Pittsburgh, USA

## 1. PMF analysis for smog chamber Experiments 1-4

PMF using PET (Ulbrich et al., 2009) was applied to the AMS results of each of the 4 experiments separately. The selection of the solution was based on the characteristics of their mass spectra and corresponding time series. The model residuals for the 1 to 3 factors solutions are illustrated in Figures S1-S4. Moving from 1 to 2 factors resulted in a significant reduction of the residuals. The 3-factor solution residuals were slightly lower than those of the 2-factor solution but the improvement was marginal. The 3-factor solution is discussed in a subsequent section.

The corresponding  $Q/Q_{\text{exp}}$  versus the number of the factors is shown in Figures S5-S8. For the 2 factor solution we selected an  $f_{\text{peak}}$  value in the range in which the solution was stable. Figures S9-S12 depict the  $Q/Q_{\text{exp}}$  versus the  $f_{\text{peak}}$  value for each experiment. The stable  $f_{\text{peak}}$  regions for Experiments 1-4 were -2.0-0.4, -0.2-1.0, -1.0-1.0 and 0.0-1.0 respectively and the selected  $f_{\text{peak}}$  values were -0.6, 0.0, -0.4 and 0.0.

In all four cases the 3-factor solution resulted in a fresh, an intermediate and in an aged factor. The corresponding time series and mass spectra are shown in Figures S13 and S16. Moving to 4 factors one of the factors was split into two parts. Figure S17 and S18 shows the time series and the mass spectra of the 4-factor PMF solution for experiment 2, where the intermediate factor was split into two factors with similar time series and mass spectra.

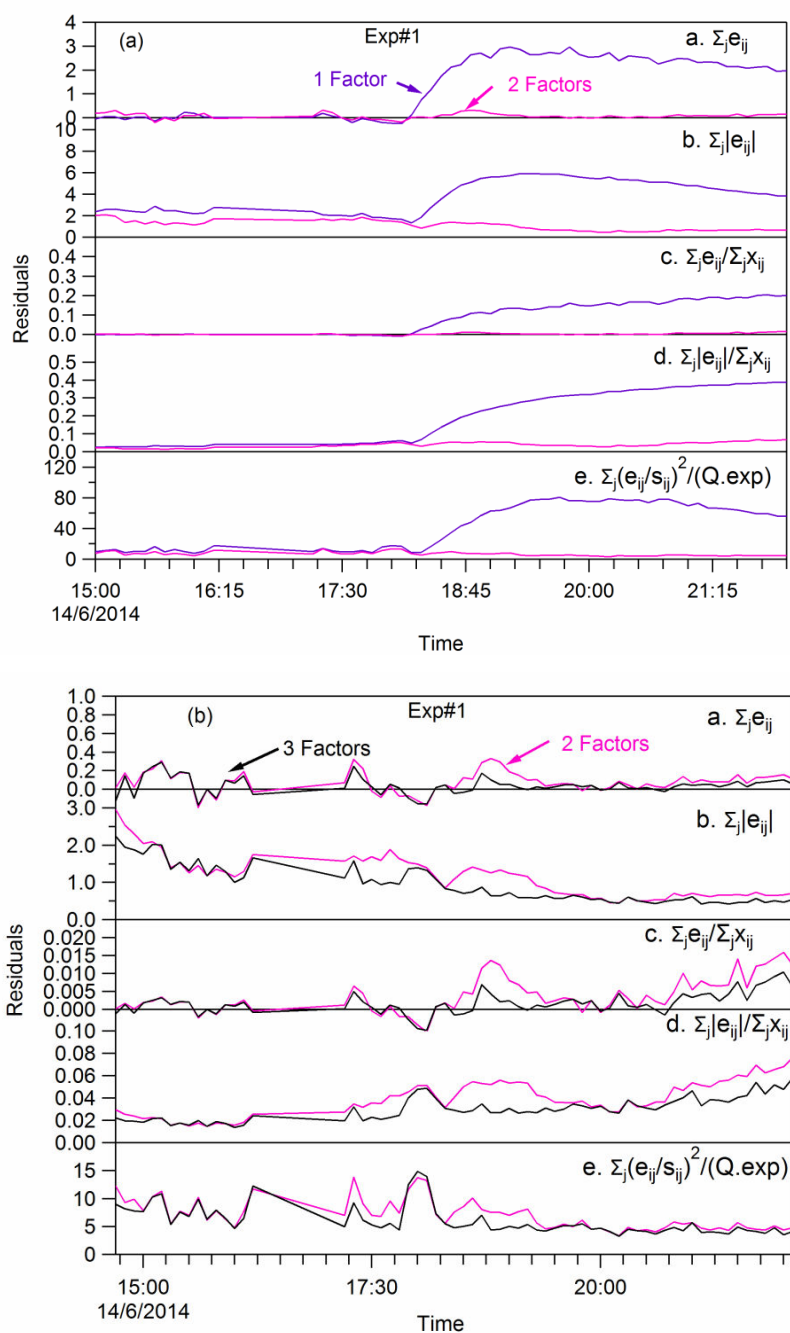

**Figure S1.** Model residuals  $E = X - GF$  calculated using the PMF evaluation tool, PET (Ulbrich et al., 2009) for Experiment 1. Comparison between: (a) 1-factor (purple lines) and 2-factor (pink lines) PMF solution and (b) 2-factor (pink lines) and 3-factor (black lines) solution. The residuals decreased significantly moving from 1 to 2 factors.

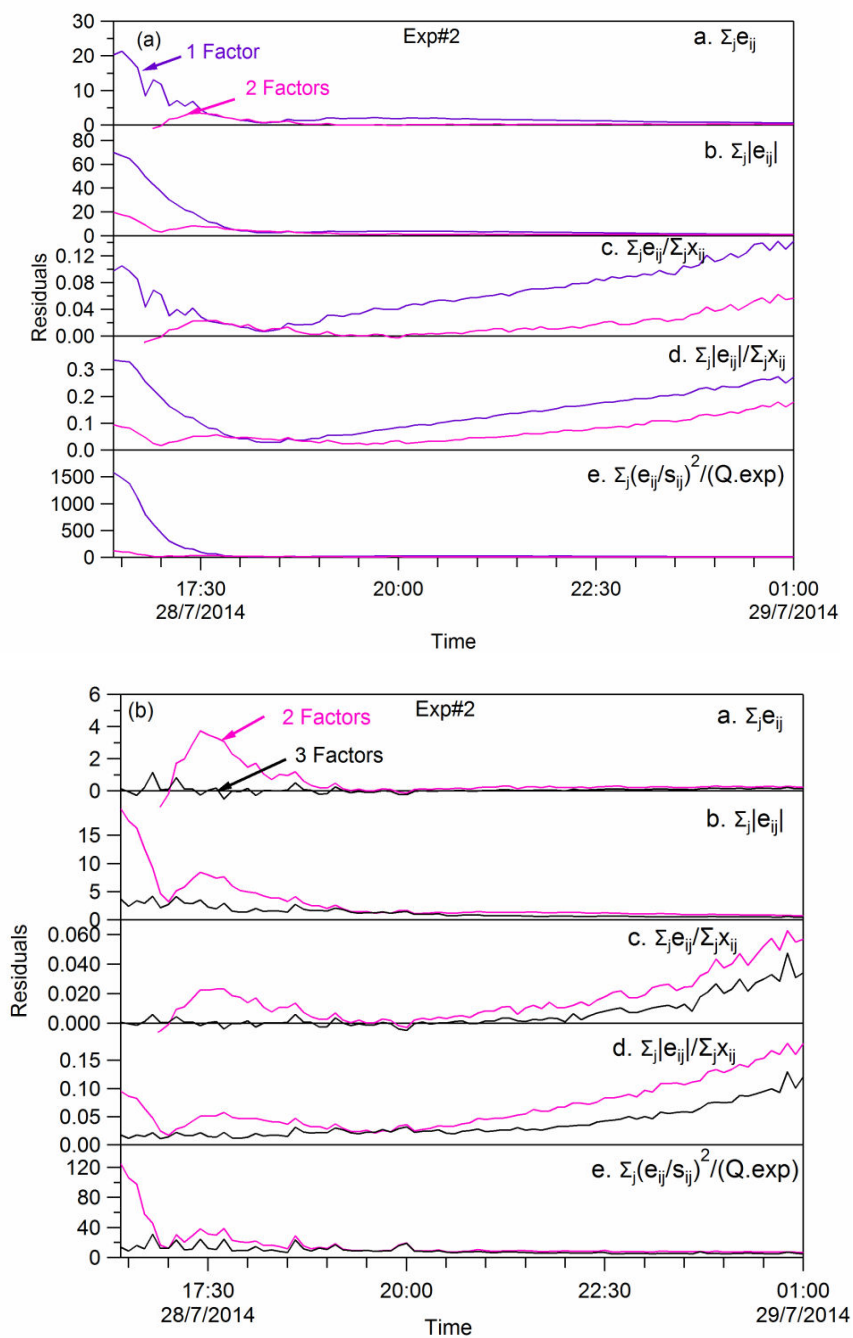

**Figure S2.** Model residuals  $\mathbf{E} = \mathbf{X} - \mathbf{GF}$  calculated using the PMF evaluation tool, PET (Ulbrich et al., 2009) for Experiment 2. Comparison between: (a) 1-factor (purple lines) and 2-factor (pink lines) PMF solution and (b) 2-factor (pink lines) and 3-factor (black lines) solution.

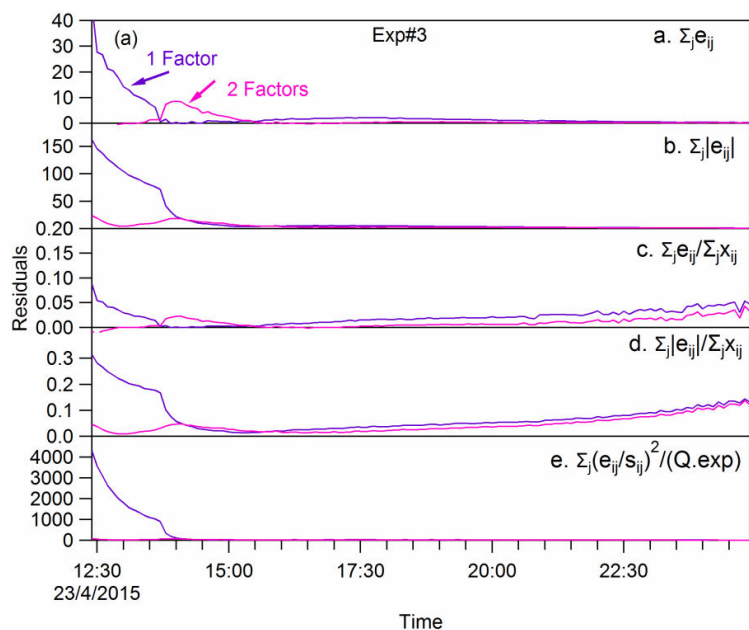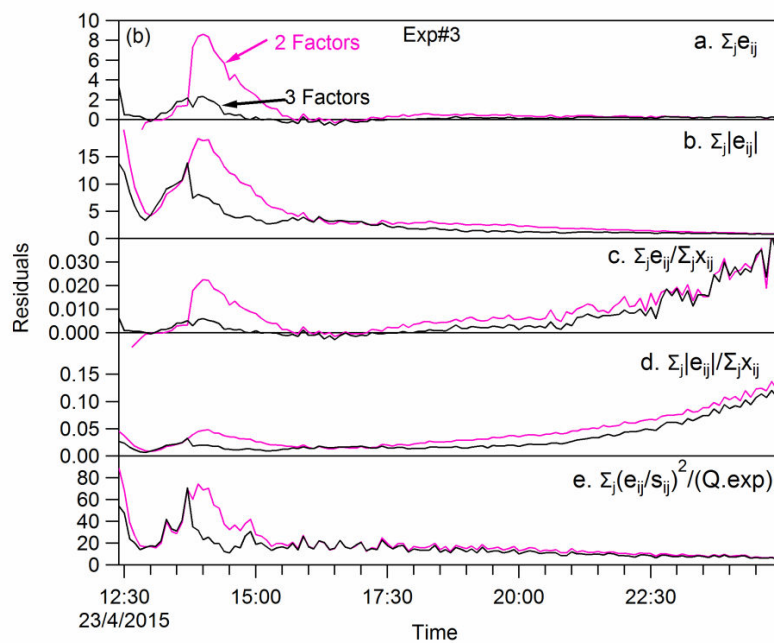

**Figure S3.** Model residuals  $\mathbf{E} = \mathbf{X} - \mathbf{GF}$  calculated using the PMF evaluation tool, PET (Ulbrich et al., 2009) for Experiment 3. Comparison between: (a) 1-factor (purple lines) and 2-factor (pink lines) PMF solution and (b) 2-factor (pink lines) and 3-factor (black lines) solution.

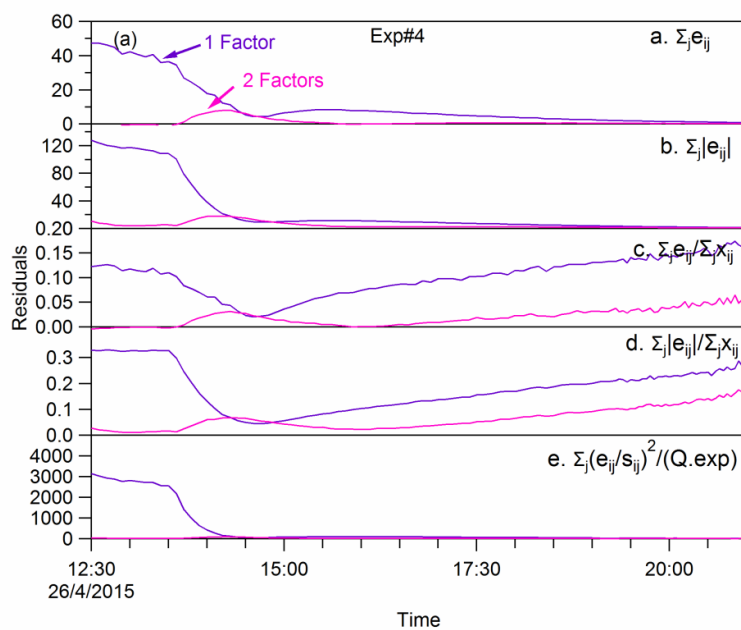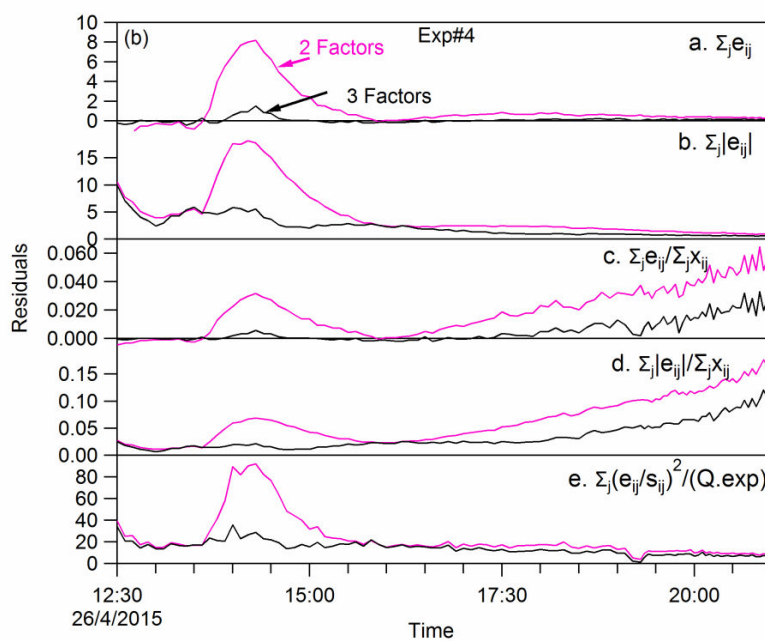

**Figure S4.** Model residuals  $\mathbf{E} = \mathbf{X} - \mathbf{G}\mathbf{F}$  calculated using the PMF evaluation tool, PET (Ulbrich et al., 2009) for Experiment 4. Comparison between: (a) 1-factor (purple lines) and 2-factor (pink lines) PMF solution and (b) 2-factor (pink lines) and 3-factor (black lines) solution.

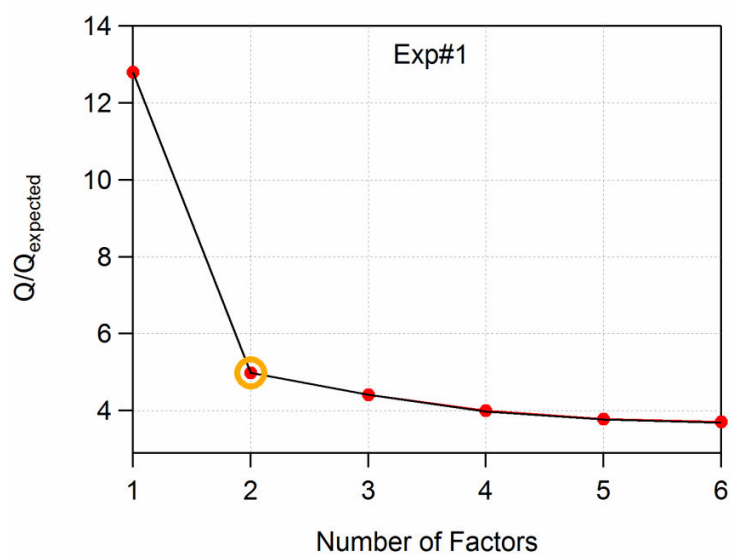

**Figure S5.**  $Q/Q_{\text{exp}}$  versus the number of the PMF factors for Experiment 1.

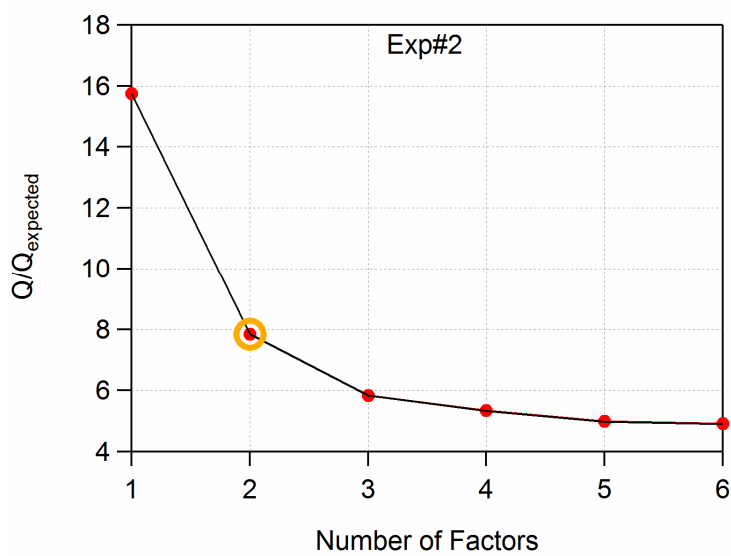

**Figure S6.**  $Q/Q_{\text{exp}}$  versus the number of the PMF factors for Experiment 2.

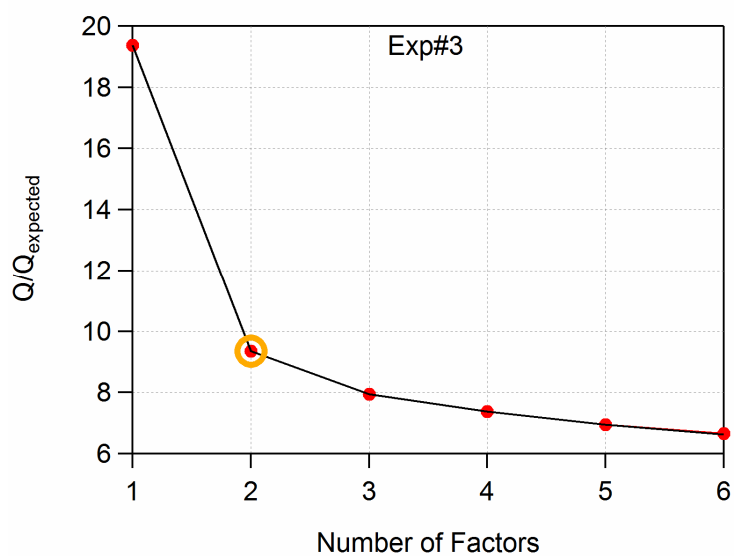

**Figure S7.**  $Q/Q_{\text{exp}}$  versus the number of the PMF factors for Experiment 3.

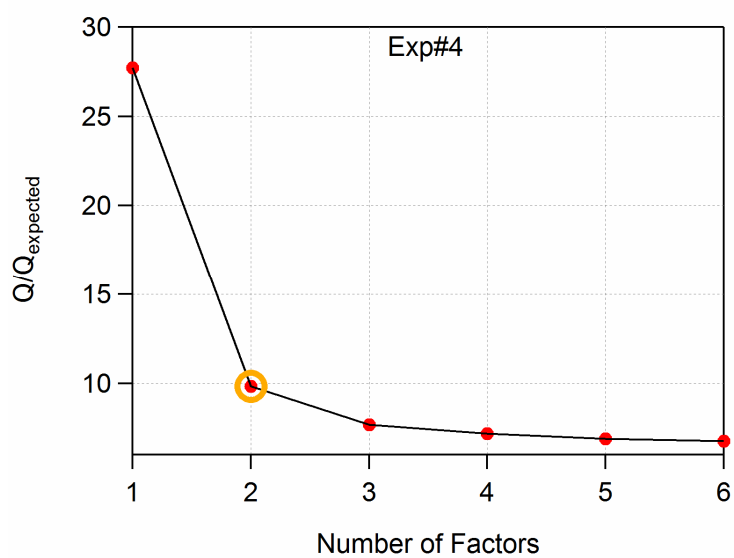

**Figure S8.**  $Q/Q_{\text{exp}}$  versus the number of the PMF factors for Experiment 4.



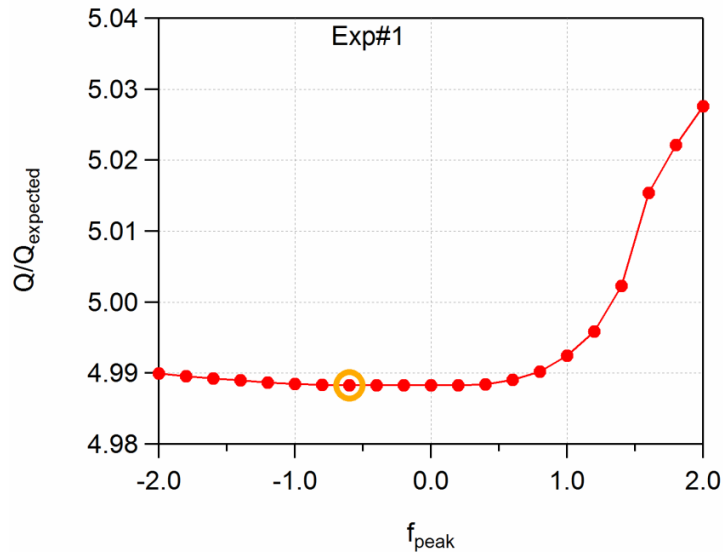

**Figure S9.**  $Q/Q_{exp}$  for  $f_{peak}$  values from -2 to 2 for the 2-factor solution for Experiment 1. The stable solution corresponds to  $f_{peak}$  values between -2.0 and 0.4. We selected  $f_{peak} = -0.6$ .

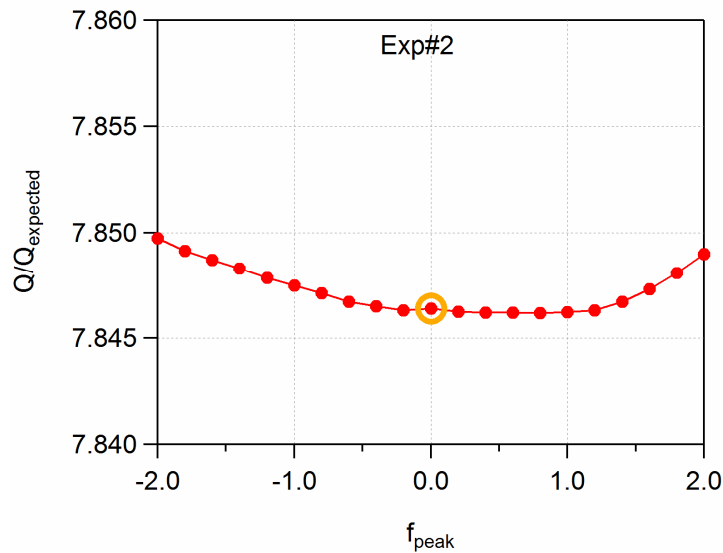

**Figure S10.**  $Q/Q_{exp}$  for  $f_{peak}$  values from -2 to 2 for the 2-factor solution for Experiment 2. The solution is stable for  $f_{peak}$  values between -0.2 and 1. We selected  $f_{peak} = 0.0$ .

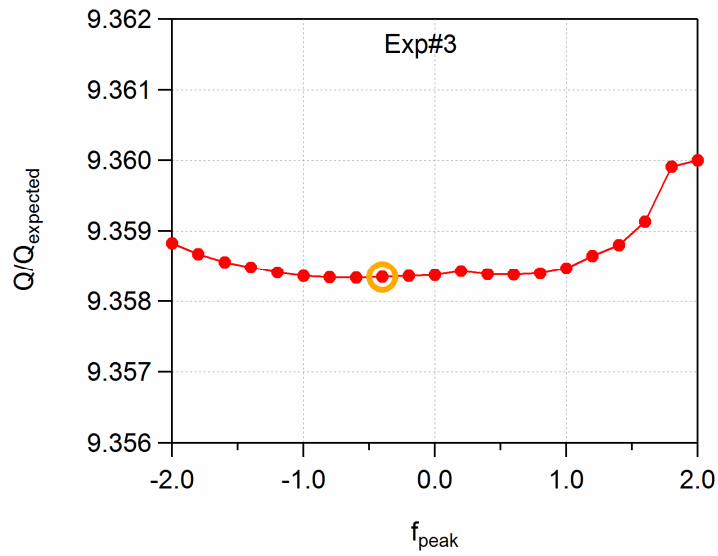

**Figure S11.**  $Q/Q_{\text{exp}}$  for  $f_{\text{peak}}$  values from -2 to 2 for the 2-factor solution for Experiment 3. The solution is stable for  $f_{\text{peak}}$  values between -1.0 and -1.0. We selected  $f_{\text{peak}} = -0.4$ .

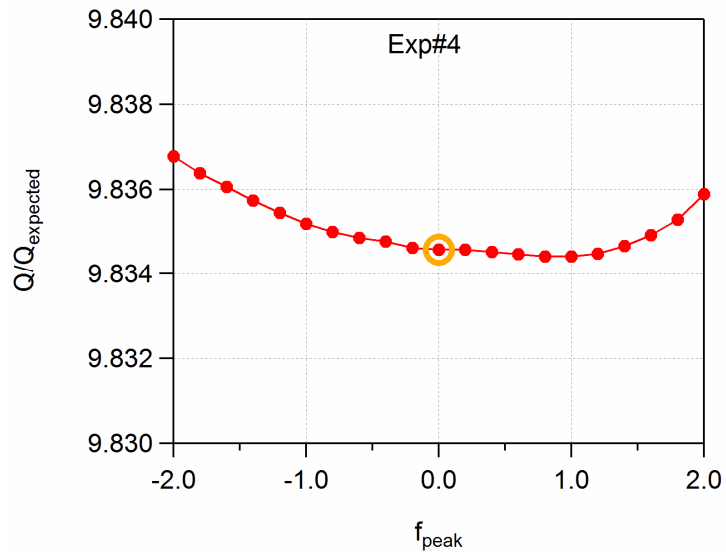

**Figure S12.**  $Q/Q_{\text{exp}}$  for  $f_{\text{peak}}$  values from -2 to 2 for the 2-factor solution for Experiment 4. The solution is stable for  $f_{\text{peak}}$  values between 0.0 and 1.0. We selected  $f_{\text{peak}} = 0.0$ .

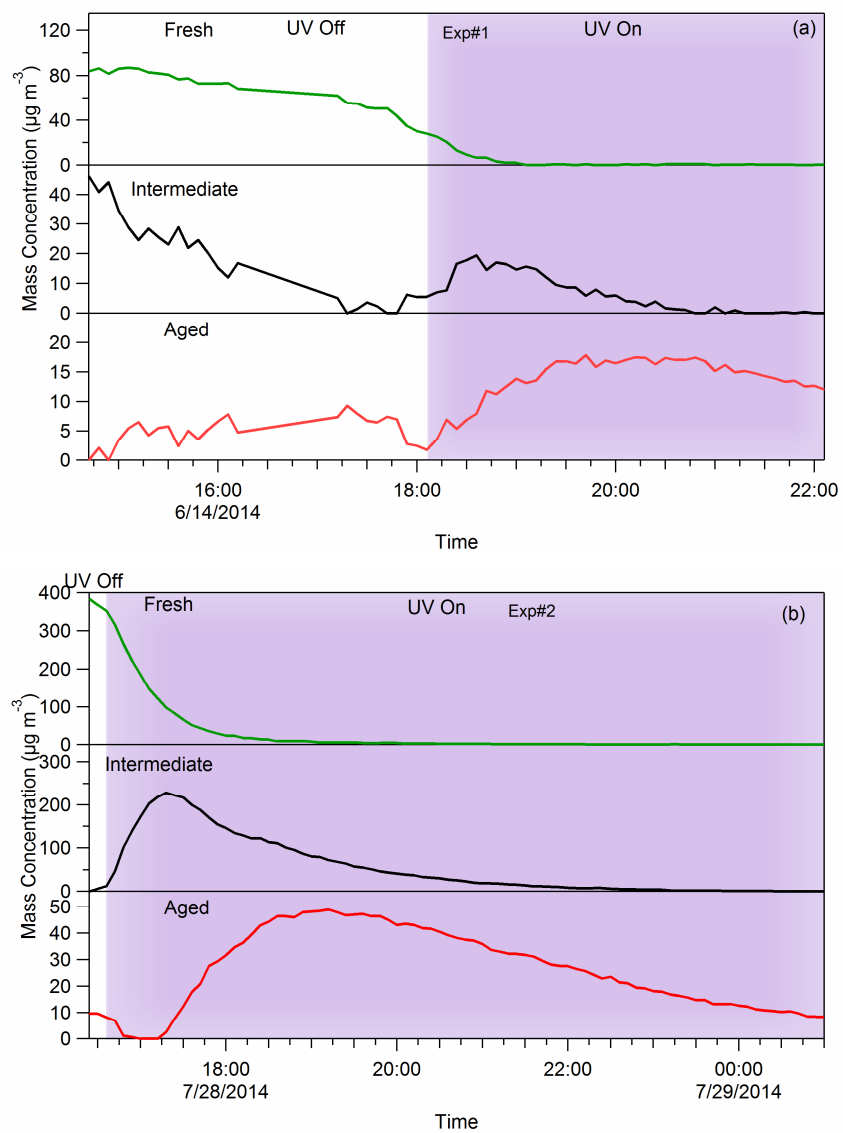

**Figure S13.** PMF factor time series for Experiments: (a) 1 and (b) 2 for the 3-factor solution.

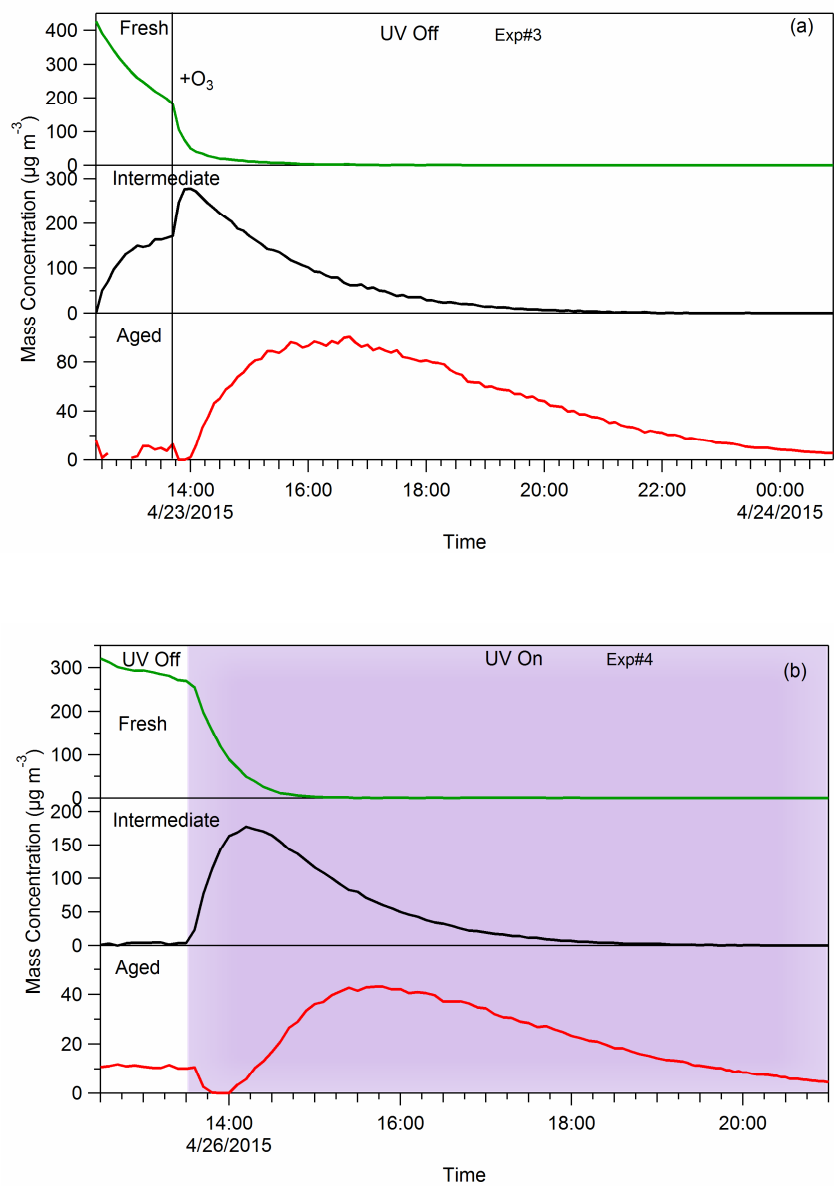

**Figure S14.** PMF factor time series for Experiments: (a) 3 and (b) 4 for the 3-factor solution.

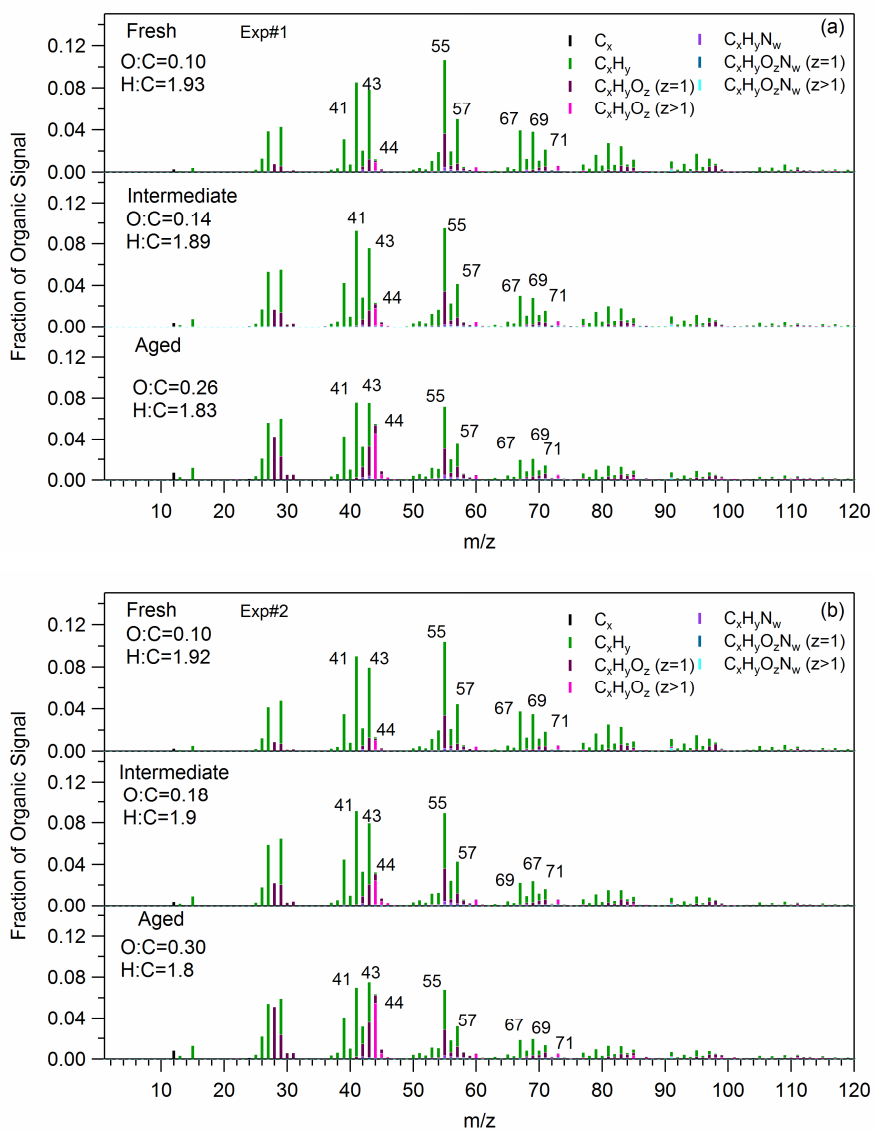

**Figure S15.** PMF factor mass spectra for Experiments: (a) 1 and (b) 2 for the 3-factor solution.

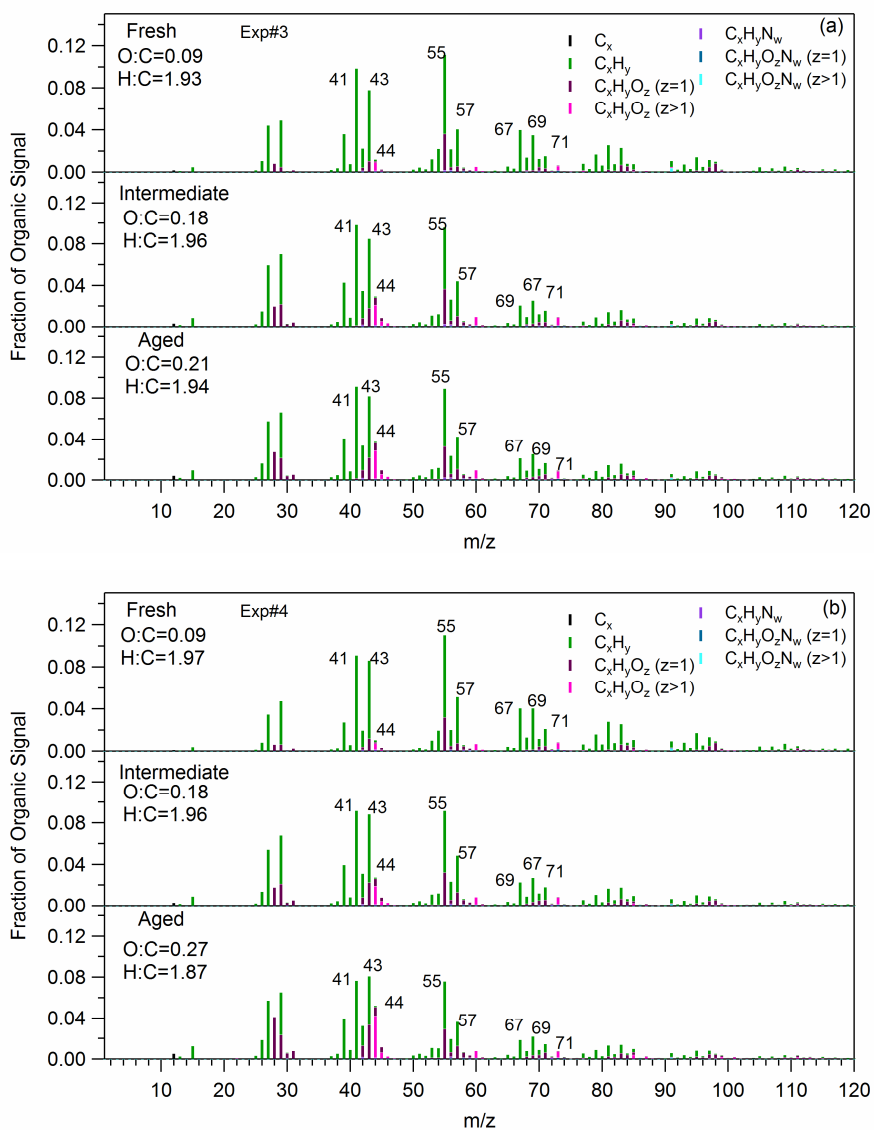

**Figure S16.** PMF factor mass spectra for Experiments: (a) 3 and (b) 4 for the 3-factor solution.

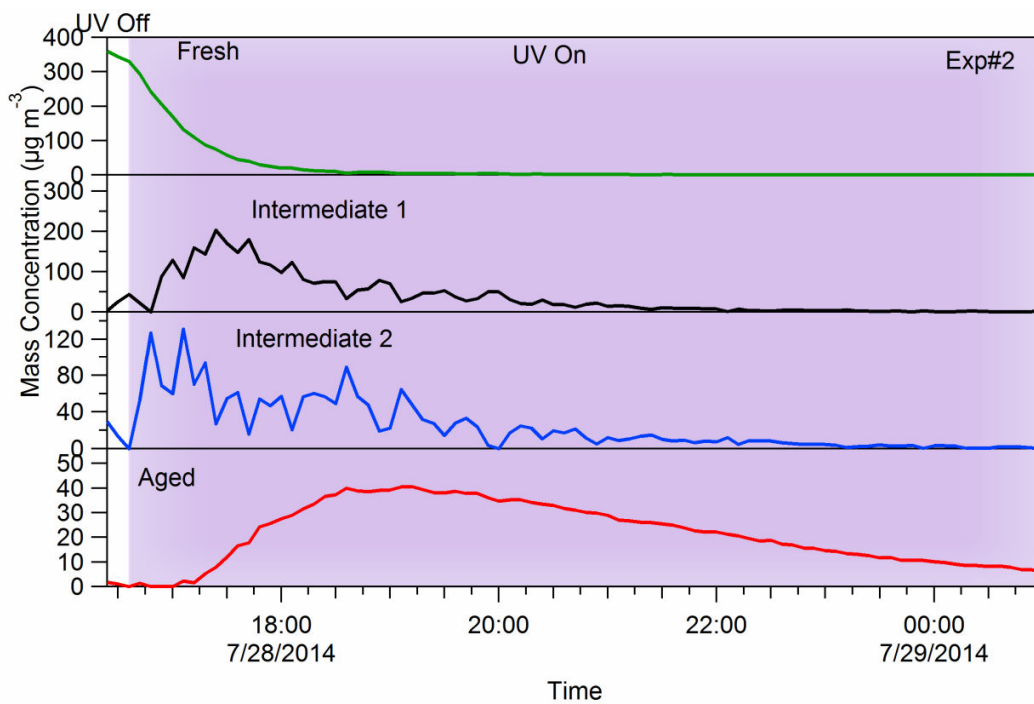

**Figure S17.** Time series of the concentrations of the PMF factors for Experiment 2 for the 4-factor solution. The intermediate factor has been split into two factors with similar time series.

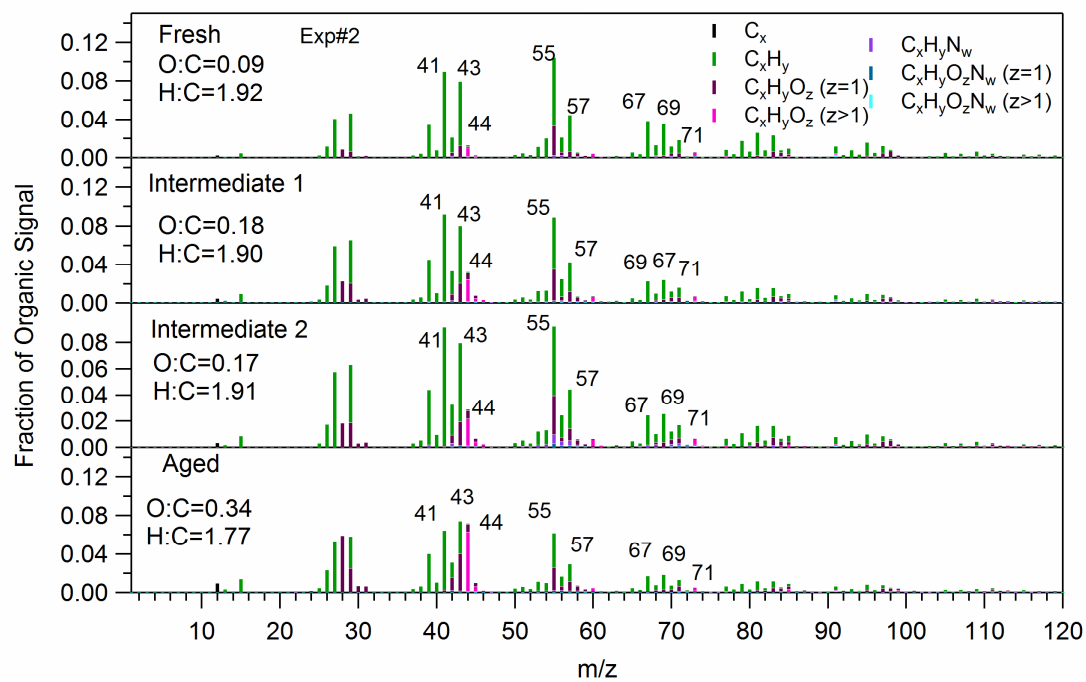

**Figure S18.** PMF factor mass spectra for Experiment 2 for the 4-factor solution. The intermediate factor has been split into two factors with similar mass spectra.



## 2. PMF analysis for the ambient measurements

Figure S19 depicts the model residuals for solutions with 1 to 5 factors using PET (Ulbrich et al., 2009). There is an important decrease in the residuals moving from 3 to 4 factors, but there is little change between 4 and 5 factors. Thus a 4 factor solution was selected.

The  $Q/Q_{\text{exp}}$  versus the number of the factors is illustrated in Figure S20. Figure S21 depicts the  $Q/Q_{\text{exp}}$  versus  $f_{\text{peak}}$ . The solution was quite stable for  $f_{\text{peak}}$  values from -0.6 to 0.8 and therefore we selected  $f_{\text{peak}}=0.0$ .

Moving to 5 factors the otBB-OA factor was split into two similar factors. Figure S22 and S23 show the corresponding mass spectra and time series for this case.

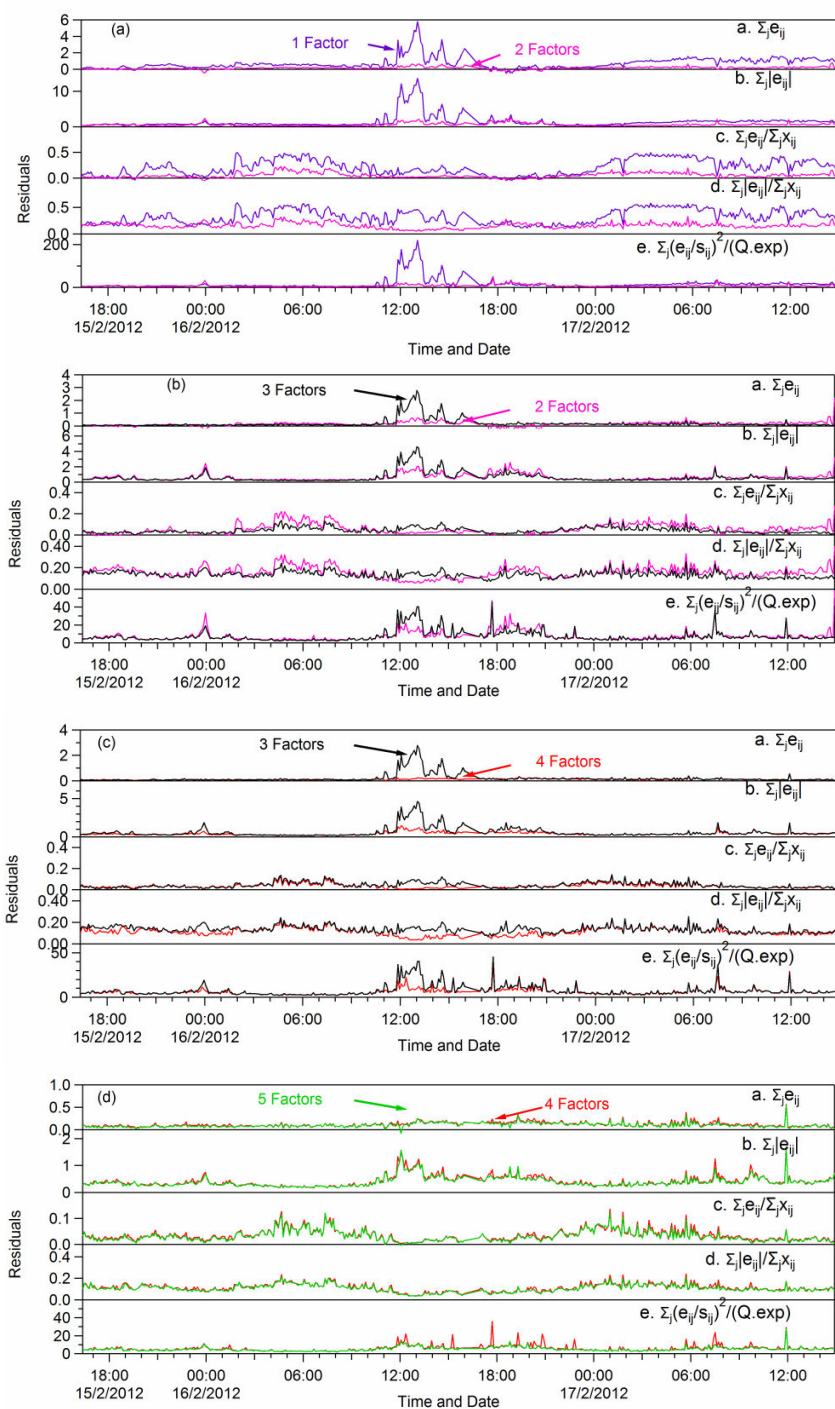

**Figure S19.** Model residuals  $\mathbf{E} = \mathbf{X} - \mathbf{GF}$  calculated using the PMF evaluation tool, PET (Ulbrich et al., 2009) for the ambient measurements. Comparison between: (a) 1-factor (purple lines) and 2-factor (pink lines) PMF solutions, (b) 2-factor (pink lines) and 3-factor (black lines) solutions, (c) 3-factor (black lines) and 4-factor (red lines) solutions, and (d) 4-factor (red lines) to 5-factor (green lines) solutions. The residuals decreased significantly moving from 3 to 4 factors, but there was no significant change from 4 to 5 factors.

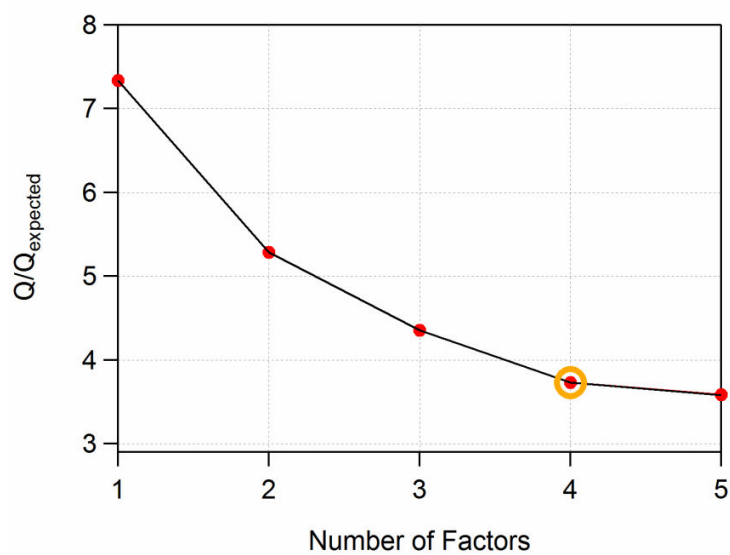

**Figure S20.**  $Q/Q_{\text{exp}}$  versus the number of factors for the ambient measurements.

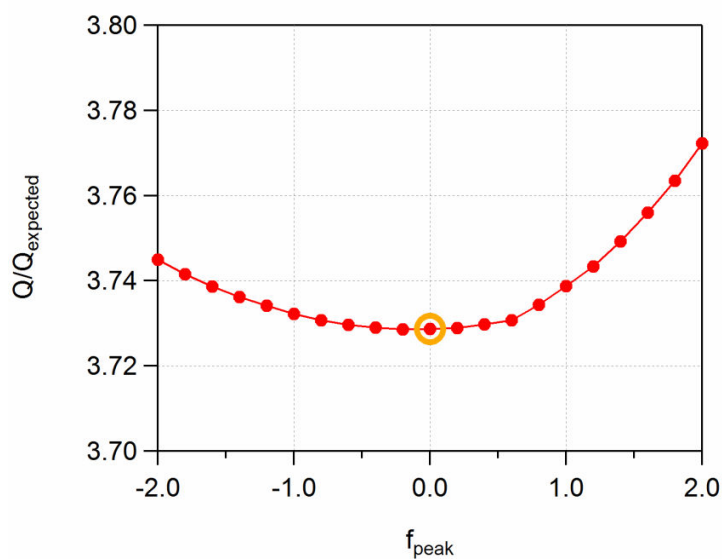

**Figure S21.**  $Q/Q_{\text{exp}}$  for  $f_{\text{peak}}$  values -2 to 2 for a 4 factor solution for the ambient measurements. The solution was stable for  $f_{\text{peak}}$  values between -0.6 and 0.8. We selected  $f_{\text{peak}}=0.0$ .

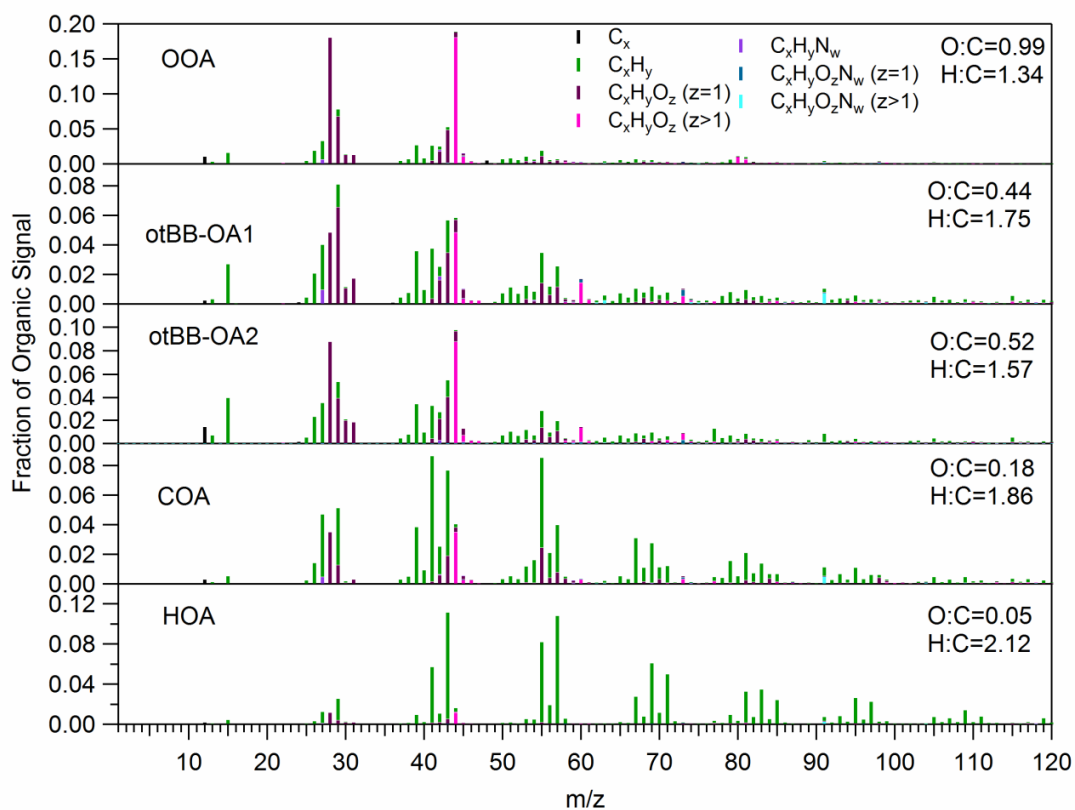

**Figure S22.** The PMF mass spectra for 5-factor solution which resulted in two otBB-OA factors with similar spectra.

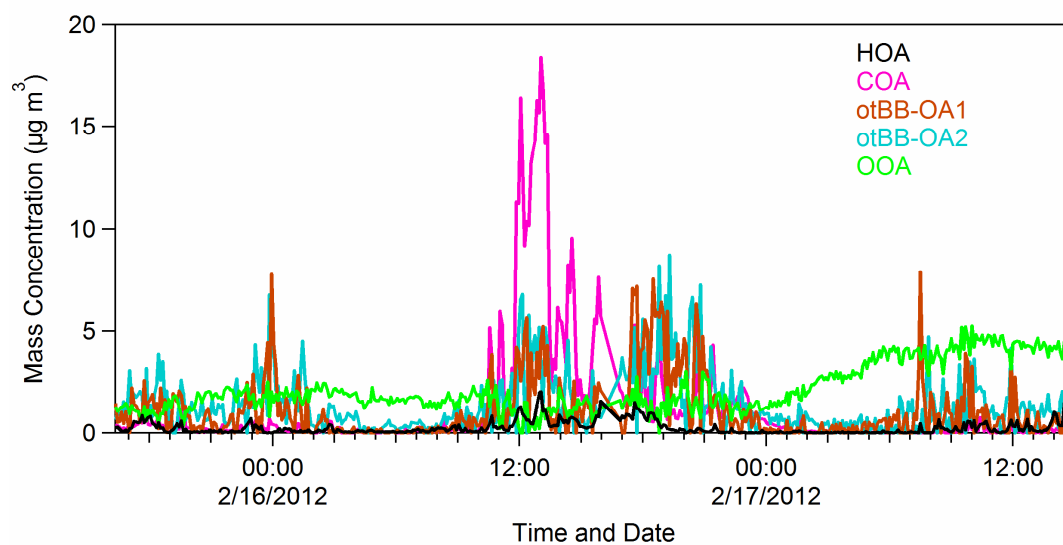

**Figure S23.** The time series of the 5 factors for the corresponding solution in which otBB-OA was split into two factors with similar quite noisy time series.

### 3. PMF analysis for the ambient measurements using ME-2

ME-2 (Canonaco et al., 2013) was also used for the analysis of the AMS field data using the HR organic mass spectra. First we examined the 4-factor solution without using an external factor profile. The resulting four factors were almost identical to those derived using PMF/PET. Figure S25 shows the comparison of the corresponding time series resulting from the two algorithms. The  $R^2$  were higher than 0.99. Figure S26 depicts the four ME-2 spectra. The  $R^2$  between the corresponding mass spectra using PET was again higher than 0.99 ( $\theta < 2$  degrees).

After this test ME-2 was used again applying a constrained solution for the HOA using the HOA mass spectrum of Kostenidou et al. (2013) with  $a=0.1$ . The corresponding four time series are shown in Figure S27. The OOA, otBB-OA and COA times series did not change ( $R^2 > 0.99$ ) for all practical purposes, but the HOA times series had a lower correlation ( $R^2 = 0.79$ ) with the unconstrained HOA solution. Figure S28 shows the four mass spectra using the constrained solution, which are practically the same with the unconstrained factors ( $R^2 > 0.99$ ,  $\theta < 2$  degrees).

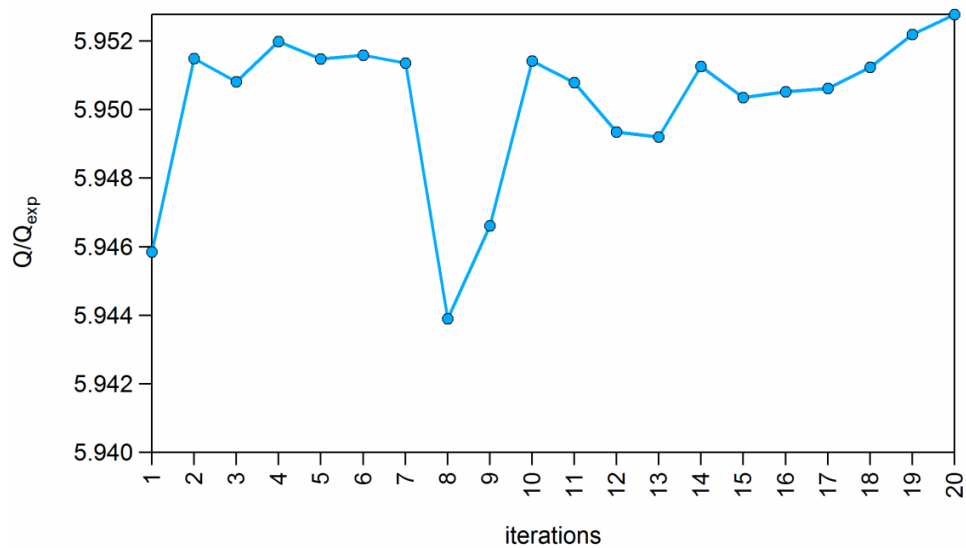

**Figure S24.**  $Q/Q_{\text{exp}}$  for 20 iterations for the 4-factor solution for the ambient measurements. The solution is quite stable.

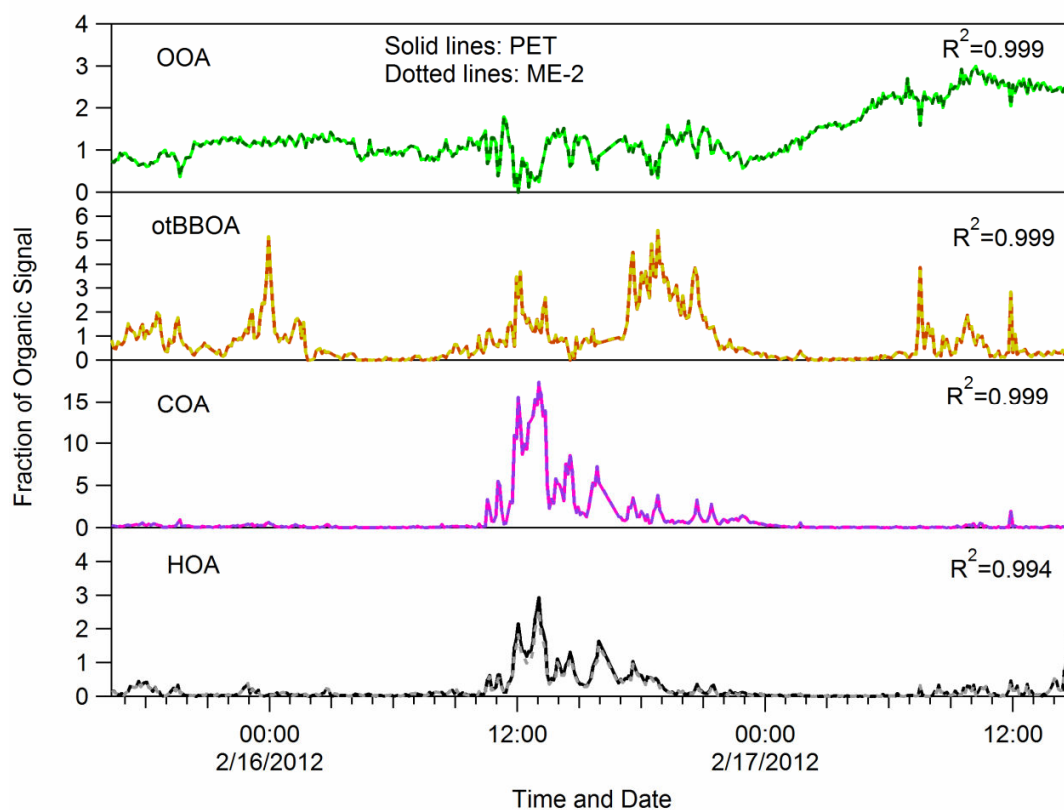

**Figure S25.** Time series of the 4 factors using PMF/PET (solid lines) and ME-2 (dotted lines). The results are almost identical with  $R^2 > 0.99$ .



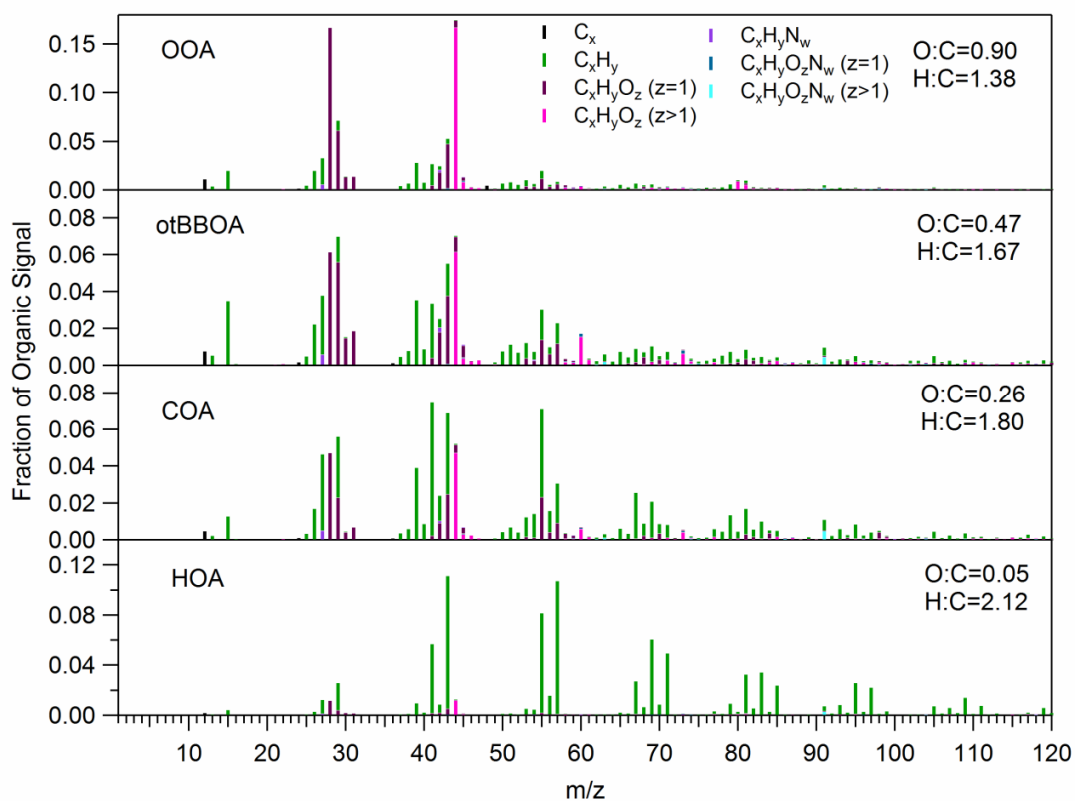

**Figure S26.** Mass spectra of the four factors using ME-2. They are quite similar to those derived using PMF/PET with  $\theta < 2$  degrees ( $R^2 > 0.99$ ).

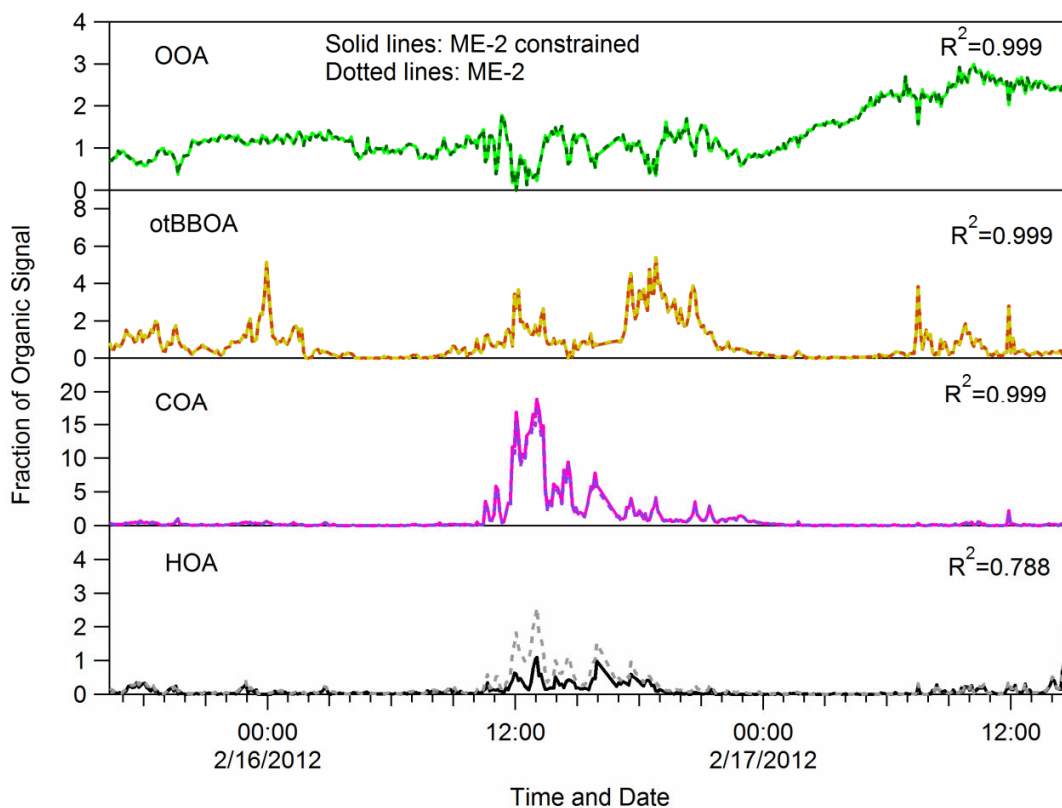

**Figure S27.** Time series of the four factors using ME-2 for an unconstrained solution (dotted lines) and a constrained solution (solid lines). The results were almost the same for the OOA, otBB-OA and COA factors. However, for the HOA there were small differences.

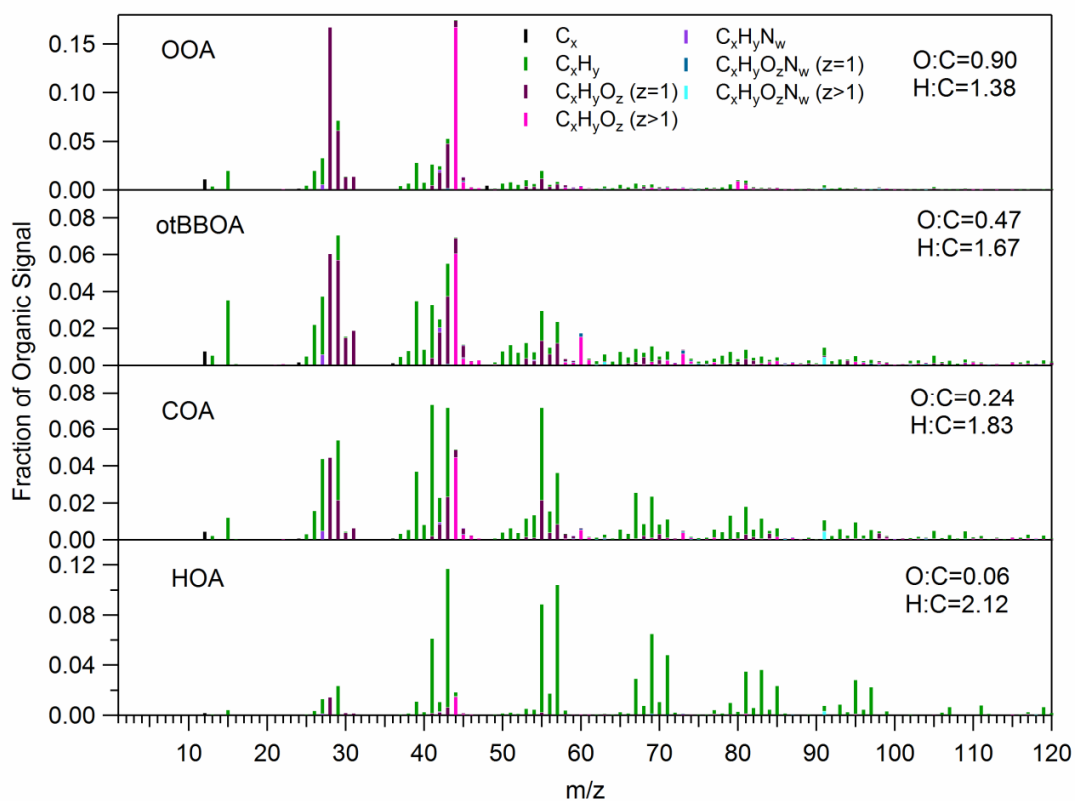

**Figure S28.** Mass spectra of the four factors using a constrained solution in ME-2. The resulting 4 mass spectra were practically the same with those of the unconstrained solution ( $R^2 > 0.99$ ,  $\theta < 2$  degrees).
